# Supplementary material for: Natural Products Are a Promising Source for Anthelmintic Drug Discovery
Source: MDPI journal article supplement (doi:10.3390/biom11101457), 2021-10-04
Supplement: s1 [file s1]

**Supplementary Table S1.** Traditional medicinal plant extracts evaluated in vitro and in vivo for anthelmintic activity from year 2000 to 2019.

| <b>Plant Species</b>              | <b>Model System</b>                             | <b>In Vitro/In Vivo</b> | <b>Reference</b> |
|-----------------------------------|-------------------------------------------------|-------------------------|------------------|
| <i>Tulbaghia violacea</i>         | <i>Caenorhabditis elegans</i>                   | in vitro                | [1]              |
| <i>Rhus geinzii</i>               | <i>Schistosoma</i>                              | in vitro                | [2]              |
| <i>Piliostigma thonningii</i>     | <i>Schistosoma</i>                              | in vitro                | [3]              |
| <i>Ocimum gratissimum</i>         | <i>Schistosoma</i>                              | in vitro                | [3]              |
| <i>Nauclea latifolia</i> and      | <i>Schistosoma</i>                              | in vitro                | [3]              |
| <i>Alstonia boonei</i>            | <i>Schistosoma</i>                              | in vitro                | [3]              |
| <i>Buchholzia coriaceae</i>       | <i>Pheretima posthuma</i>                       | in vitro                | [4]              |
| <i>Gynandropsis gynandra</i>      | <i>Pheretima posthuma</i>                       | in vitro                | [4]              |
| <i>Combretum apiculatum</i>       | <i>Caenorhabditis elegans</i>                   | in vitro                | [5]              |
| <i>Berlina grandiflora</i>        | <i>Caenorhabditis elegans</i>                   | in vitro                | [6]              |
| <i>Abrus precatorius</i>          | <i>Schistosoma mansoni</i>                      | in vitro                | [7]              |
| <i>Elephantorrhiza goetzei</i>    | <i>Schistosoma mansoni</i>                      | in vitro                | [7]              |
| <i>Evolvulus alsinoides</i>       | <i>Pheretima posthuma</i>                       | in vitro                | [8]              |
| <i>Myrsine africana</i>           | <i>Haemonchus contortus</i> -Sheep model        | in vitro                | [9]              |
| <i>Rapanea melanophloeos</i>      | <i>Haemonchus contortus</i> - Sheep model       | in vitro                | [9]              |
| <i>Vernonia amygdalina</i> (leaf) | <i>Haemonchus contortus</i>                     | in vitro                | [10,11]          |
| <i>Annona senegalensis</i>        | <i>Haemonchus contortus</i>                     | in vitro                | [10]             |
| <i>Aframomum sanguineum</i> ,     | <i>Heligmosomoides polygyrus</i> in mouse model | in vitro                | [12]             |
| <i>Dodonea angustifolia</i>       | <i>Heligmosomoides polygyrus</i> in mouse model | in vitro                | [12]             |
| <i>Hildebrandtia sepalosa</i> ,   | <i>Heligmosomoides polygyrus</i> in mouse model | in vitro                | [12]             |
| <i>Myrsine africana</i>           | <i>Heligmosomoides polygyrus</i> in mouse model | in vitro                | [12]             |
| <i>Rapanea melanophloeos</i>      | <i>Heligmosomoides polygyrus</i> in mouse model | in vitro                | [12]             |

|                                   |                                                                                                             |                      |         |
|-----------------------------------|-------------------------------------------------------------------------------------------------------------|----------------------|---------|
| <i>Azadirachta indica.</i>        | <i>Heligmosomoides polygyrus</i> in mouse model                                                             | in vitro             | [12]    |
| <i>Khaya senegalensis</i>         | <i>Strongyles Spp</i> <i>Caenorhabditis elegans</i><br><i>Onchocerca ochengi</i> <i>Echinostoma caproni</i> | in vitro             | [13-15] |
| <i>Artemisia brevifolia</i>       | <i>Haemonchus contortus</i><br>Gastrointestinal nematodes- Sheep model                                      | in vitro and in vivo | [16]    |
| <i>Gossypium herbaceum</i>        | <i>Caenorhabditis elegans</i>                                                                               | in vitro             | [17]    |
| <i>Hertia pallens</i>             | <i>Caenorhabditis elegans</i>                                                                               | in vitro             | [17]    |
| <i>Jatropha multifida</i>         | <i>Caenorhabditis elegans</i>                                                                               | in vitro             | [17]    |
| <i>Lantana rugosa</i>             | <i>Caenorhabditis elegans</i>                                                                               | in vitro             | [17]    |
| <i>Onobrychis viciifolia</i>      | <i>Haemonchus contortus</i>                                                                                 | in vitro             | [18]    |
| <i>leucaena leucocephala</i>      | <i>Haemonchus contortus</i>                                                                                 | in vitro             | [19]    |
| <i>Echinops ellenbeckii</i>       | Earth worm                                                                                                  | in vitro             | [20]    |
| <i>Echinops longisetus</i>        | Earth worm                                                                                                  | in vitro             | [20]    |
| <i>Cannabis sativa</i>            | <i>Ascaris suum</i>                                                                                         | in vitro             | [21]    |
| <i>Moringa oleifera</i>           | <i>Ascaris suum</i>                                                                                         | in vitro             | [21]    |
| <i>Carica papaya</i>              | <i>Ascaris suum</i>                                                                                         | in vitro             | [21]    |
| <i>Cassia occidentalis</i>        | <i>Ascaris suum</i>                                                                                         | in vitro             | [21]    |
| <i>Momordica foetida</i>          | <i>Ascaris suum</i>                                                                                         | in vitro             | [21]    |
| <i>Erythrina abyssinica</i>       | <i>Ascaris suum</i>                                                                                         | in vitro             | [21]    |
| <i>Tetradenia ripara</i>          | <i>Ascaris suum</i>                                                                                         | in vitro             | [21]    |
| <i>Peltophorum africanum</i>      | <i>Trichostrongylus colubriformis</i>                                                                       | in vitro             | [22]    |
| <i>Zingiber officinale</i> Roscoe | Sheep model with mix gastrointestinal parasites                                                             | in vivo              | [23]    |
| <i>Coriandrum sativum</i>         | <i>Haemonchus contortus</i><br><i>H. contortus</i> with sheep model                                         | in vitro and in vivo | [24]    |
| <i>Sapium sebiferum</i>           | <i>Bursaphelenchus xylophilus</i> ,<br><i>Panagrellus redivivus</i>                                         | in vitro             | [25]    |
| <i>Magnolia grandiflora</i>       | <i>Bursaphelenchus xylophilus</i> ,<br><i>Panagrellus redivivus</i>                                         | in vitro             | [25]    |

|                                   |                                                                     |                      |      |
|-----------------------------------|---------------------------------------------------------------------|----------------------|------|
| <i>Michelia hedyosperma</i>       | <i>Bursaphelenchus xylophilus</i> ,<br><i>Panagrellus redivivus</i> | in vitro             | [25] |
| <i>Punica granatum</i>            | <i>Bursaphelenchus xylophilus</i> ,<br><i>Panagrellus redivivus</i> | in vitro             | [25] |
| <i>Zingiber striolatum</i>        | <i>Bursaphelenchus xylophilus</i> ,<br><i>Panagrellus redivivus</i> | in vitro             | [25] |
| <i>Edgeworthia chrysantha</i>     | <i>Bursaphelenchus xylophilus</i> ,<br><i>Panagrellus redivivus</i> | in vitro             | [25] |
| <i>Nerium indicum</i>             | <i>Bursaphelenchus xylophilus</i> ,<br><i>Panagrellus redivivus</i> | in vitro             | [25] |
| <i>Pongamia glabra</i>            | <i>Pheretima posthuma</i>                                           | in vitro             | [26] |
| <i>Cissus quadrangularis</i>      | <i>Caenorhabditis elegans</i>                                       | in vitro             | [27] |
| <i>Pouzolzia mixta</i> Solms      | <i>Caenorhabditis elegans</i>                                       | in vitro             | [27] |
| <i>Gnidia capitata</i>            | <i>Caenorhabditis elegans</i>                                       | in vitro             | [27] |
| <i>Dombeya rotundifolia</i>       | <i>Caenorhabditis elegans</i>                                       | in vitro             | [27] |
| <i>Hippobromus pauciflorus</i>    | <i>Caenorhabditis elegans</i>                                       | in vitro             | [27] |
| <i>Ziziphus mucronata</i>         | <i>Caenorhabditis elegans</i>                                       | in vitro             | [27] |
| <i>Berchemia zeyheri</i>          | <i>Caenorhabditis elegans</i>                                       | in vitro             | [27] |
| <i>Dicerocaryum eriocarpum</i>    | <i>Caenorhabditis elegans</i>                                       | in vitro             | [27] |
| <i>Schotia brachypetala</i>       | <i>Caenorhabditis elegans</i>                                       | in vitro             | [27] |
| <i>Pterocarpus angolensis</i>     | <i>Caenorhabditis elegans</i>                                       | in vitro             | [27] |
| <i>Synadenium cupulare</i>        | <i>Caenorhabditis elegans</i>                                       | in vitro             | [27] |
| <i>Ricinus communis</i>           | <i>Caenorhabditis elegans</i>                                       | in vitro             | [27] |
| <i>Schkuhria pinnata</i>          | <i>Caenorhabditis elegans</i>                                       | in vitro             | [27] |
| <i>Cussonia spicata</i>           | <i>Caenorhabditis elegans</i>                                       | in vitro             | [27] |
| <i>Secamone filiformis</i>        | <i>Caenorhabditis elegans</i>                                       | in vitro             | [27] |
| <i>Sclerocarya birrea</i>         | <i>Caenorhabditis elegans</i>                                       | in vitro             | [27] |
| <i>Rhus lancea</i>                | <i>Caenorhabditis elegans</i>                                       | in vitro             | [27] |
| <i>Caesalpinia crista</i>         | <i>H. contortus</i>                                                 | in vitro and in vivo | [28] |
| <i>Chenopodium album</i>          | <i>H. contortus</i>                                                 | in vitro and in vivo | [28] |
| <i>Terminalia chebula</i> (fruit) | <i>Pheretima posthuma</i>                                           | in vitro             | [29] |
| <i>Terminalia chebula</i> (Seed)  | <i>Haemonchus contortus</i>                                         | in vitro             | [30] |

|                                            |                                                                                |                      |         |
|--------------------------------------------|--------------------------------------------------------------------------------|----------------------|---------|
| <i>Azadirachta indica</i>                  | <i>Haemonchus contortus</i>                                                    | in vitro             | [31]    |
| <i>Ficus benghalensis</i>                  | <i>Pheretima posthuma</i>                                                      | in vitro             | [32,33] |
| <i>Curcuma longa</i>                       | <i>Schistosoma mansoni</i> , <i>Caenorhabditis elegans</i>                     | in vitro             | [34]    |
| <i>Curcuma longa</i> (Stem, leaf and root) | <i>Ascaridia galli</i> in Chicken model                                        | in vitro             | [35]    |
| <i>Plumbago indica</i>                     | <i>Caenorhabditis elegans</i>                                                  | in vitro             | [34]    |
| <i>Piper nigrum</i>                        | <i>Schistosoma mansoni</i> <i>Caenorhabditis elegans</i>                       | in vitro             | [34]    |
| <i>Piper chaba</i>                         | <i>Schistosoma mansoni</i> <i>Caenorhabditis elegans</i>                       | in vitro             | [34]    |
| <i>Hibiscus esculentus</i>                 | <i>Schistosoma mansoni</i>                                                     | in vitro             | [34]    |
| <i>Cordyline fruticosa</i>                 | <i>Schistosoma mansoni</i>                                                     | in vitro             | [34]    |
| <i>Michelia champaca</i>                   | <i>Schistosoma mansoni</i>                                                     | in vitro             | [34]    |
| <i>Butea monosperma</i>                    | <i>Schistosoma mansoni</i>                                                     | in vitro             | [34]    |
| <i>Phyllanthus emblica</i>                 | <i>Caenorhabditis elegans</i>                                                  | in vitro             | [34]    |
| <i>Baccaurea ramiflora</i>                 | <i>Schistosoma mansoni</i>                                                     | in vitro             | [34]    |
| <i>Cassia fistula</i>                      | <i>Caenorhabditis elegans</i>                                                  | in vitro             | [34]    |
| <i>Diospyros mollis</i>                    | <i>Caenorhabditis elegans</i>                                                  | in vitro             | [34]    |
| <i>Agerantum conyzoides</i>                | <i>Schistosoma mansoni</i>                                                     | in vitro             | [34]    |
| <i>Averrhoa carambola</i>                  | <i>Schistosoma mansoni</i>                                                     | in vitro             | [34]    |
| <i>Plumeria acuminata</i>                  | <i>Schistosoma mansoni</i>                                                     | in vitro             | [34]    |
| <i>Bouea burmanica</i>                     | <i>Schistosoma mansoni</i>                                                     | in vitro             | [34]    |
| <i>Spephamia rotunda</i>                   | <i>Schistosoma mansoni</i>                                                     | in vitro             | [34]    |
| <i>Areca Catechu</i>                       | <i>Schistosoma mansoni</i> , <i>Caenorhabditis elegans</i>                     | in vitro             | [34]    |
| <i>Cocos nucifera</i>                      | <i>Haemonchus contortus</i> - and Sheep model with gastro intestinal parasites | in vitro and in vivo | [36]    |
| <i>Terminalia arjuna</i>                   | <i>Haemonchus contortus</i>                                                    | in vitro             | [37]    |
| <i>Dioscorea bulbifera</i>                 | <i>Eisenia foetida</i> , <i>Raillietina spiralis</i> , <i>Ascardia galli</i>   | in vitro             | [38]    |

|                                                      |                                                                                  |          |      |
|------------------------------------------------------|----------------------------------------------------------------------------------|----------|------|
| <i>Cassia auriculata</i>                             | <i>Eisenia foetida</i> , <i>Raillietina spiralis</i> ,<br><i>Ascaridia galli</i> | in vitro | [38] |
| <i>Erythrina variegata</i>                           | <i>Eisenia foetida</i> , <i>Raillietina spiralis</i> ,<br><i>Ascaridia galli</i> | in vitro | [38] |
| <i>Euphorbia thymifolia</i>                          | <i>Pheritima posthuma</i> <i>Ascaridia galli</i> /                               | in vitro | [39] |
| <i>Cassia tora</i>                                   | <i>Pheritima posthuma</i> <i>Ascaridia galli</i> /                               | in vitro | [40] |
| <i>Ficus obtusifolia</i>                             | <i>Toxocara canis</i>                                                            | in vitro | [41] |
| <i>Acokanthera oppositifolia</i>                     | <i>Caenorhabditis elegans</i>                                                    | in vitro | [42] |
| <i>Felicia erigeroides</i>                           | <i>Caenorhabditis elegans</i>                                                    | in vitro | [42] |
| <i>Cotyledon orbiculata</i> var. <i>dactyloopsis</i> | <i>Caenorhabditis elegans</i>                                                    | in vitro | [42] |
| <i>Cotyledon orbiculata</i> var. <i>otbiculata</i>   | <i>Caenorhabditis elegans</i>                                                    | in vitro | [42] |
| <i>Cyathea dregei</i>                                | <i>Caenorhabditis elegans</i>                                                    | in vitro | [42] |
| <i>Senna petersiana</i>                              | <i>Caenorhabditis elegans</i>                                                    | in vitro | [42] |
| <i>Hypoxis hemerocallidea</i>                        | <i>Caenorhabditis elegans</i>                                                    | in vitro | [42] |
| <i>Hypoxis colchicifolia</i>                         | <i>Caenorhabditis elegans</i>                                                    | in vitro | [42] |
| <i>Clerodendrum myricoides</i> (leaf and stem)       | <i>Caenorhabditis elegans</i>                                                    | in vitro | [42] |
| <i>Camellia sinensis</i>                             | <i>Pheritima posthuma</i>                                                        | in vitro | [43] |
| <i>Clerodendrum myricoides</i> (root)                | <i>Pheretima posthuma</i>                                                        | in vitro | [44] |
| <i>Ocimum basilicum</i> (Leaf)                       | <i>Caenorhabditis elegans</i>                                                    | in vitro | [42] |
| <i>Ocimum basilicum</i> (leaf, stem and root)        | <i>Pheritima posthuma</i>                                                        | in vitro | [45] |
| <i>Alocasia indica</i> (Leaves)                      | <i>Pheretima posthuma</i>                                                        | in vitro | [46] |
| <i>Alocasia indica</i> Schott. (rootstocks)          | <i>Pheretima posthuma</i>                                                        | in vitro | [47] |
| <i>Aloe ferox</i>                                    | <i>Haemonchus contortus</i>                                                      | in vitro | [48] |
| <i>Elephantorrhiza elephantina</i>                   | <i>Haemonchus contortus</i>                                                      | in vitro | [48] |
| <i>Leonotis leonurus</i>                             | <i>Haemonchus contortus</i>                                                      | in vitro | [48] |
| <i>Hyptis Suaveolens</i>                             | <i>Pheretima posthuma</i> <i>Ascaridia galli</i>                                 | in vitro | [49] |
| <i>Passiflora edulis</i>                             | <i>Eisenia fetida</i>                                                            | in vitro | [50] |
| <i>Leucosidea sericea</i>                            | <i>Caenorhabditis elegans</i>                                                    | in vitro | [42] |
| <i>Plumbago zeylanica</i>                            | <i>Pheretima posthuma</i>                                                        | in vitro | [51] |
| <i>Trianthema portulacastrum</i>                     | <i>Haemonchus contortus</i>                                                      | in vitro | [52] |

|                                          |                                                                                                           |          |      |
|------------------------------------------|-----------------------------------------------------------------------------------------------------------|----------|------|
| <i>Musa paradisiaca</i>                  | <i>Haemonchus contortus</i>                                                                               | in vitro | [52] |
| <i>Ficus carica</i>                      | <i>Caenorhabditis elegans</i>                                                                             | in vitro | [53] |
| <i>Ormosia fordiana</i>                  | <i>Caenorhabditis elegans</i>                                                                             | in vitro | [53] |
| <i>Tsoongiodendron odorum</i>            | <i>Caenorhabditis elegans</i>                                                                             | in vitro | [53] |
| <i>Manglietia aromatica</i>              | <i>Caenorhabditis elegans</i>                                                                             | in vitro | [53] |
| <i>Altingia yunnanensis</i>              | <i>Caenorhabditis elegans</i>                                                                             | in vitro | [53] |
| <i>Elaeocarpus decipiens</i>             | <i>Caenorhabditis elegans</i>                                                                             | in vitro | [53] |
| <i>Momordica cochinchinensis</i>         | <i>Caenorhabditis elegans</i>                                                                             | in vitro | [53] |
| <i>Pistacia weinmannifolia</i>           | <i>Caenorhabditis elegans</i>                                                                             | in vitro | [53] |
| <i>Catharanthus roseus</i>               | <i>Caenorhabditis elegans</i>                                                                             | in vitro | [30] |
| <i>Eclipta prostrata</i>                 | <i>Caenorhabditis elegans</i>                                                                             | in vitro | [30] |
| <i>Solanum torvum</i>                    | <i>Caenorhabditis elegans</i>                                                                             | in vitro | [30] |
| <i>Annona squamosa</i>                   | <i>Caenorhabditis elegans</i>                                                                             | in vitro | [30] |
| <i>Khaya senegalensis</i> (leaf, bark)   | <i>Onchocerca ochengi</i> , <i>Caenorhabditis elegans</i>                                                 | in vitro | [15] |
| <i>Khaya senegalensis</i> (bark)         | <i>Echinostoma caproni</i> <i>Schistosoma mansoni</i> <i>Heligmosomoides bakeri</i> <i>Trichuris muri</i> | in vitro | [14] |
| <i>Annona senegalensis</i>               | <i>Onchocerca ochengi</i> <i>Caenorhabditis elegans</i>                                                   | in vitro | [15] |
| <i>Parquetina nigrescens</i>             | <i>Onchocerca ochengi</i> <i>Caenorhabditis elegans</i>                                                   | in vitro | [15] |
| <i>Ficus exasperata</i>                  | <i>Onchocerca ochengi</i> , <i>Caenorhabditis elegans</i>                                                 | in vitro | [15] |
| <i>Euphorbia hirta</i>                   | <i>Onchocerca ochengi</i> <i>Caenorhabditis elegans</i>                                                   | in vitro | [15] |
| <i>Markhamia obtusifolia</i>             | <i>Trichostrongylus colubriformis</i>                                                                     | in vitro | [54] |
| <i>Brassica nigra</i>                    | <i>Pheritima posthuma</i>                                                                                 | in vitro | [45] |
| <i>Rumex abyssinicus</i> (Root)          | <i>Pheritima posthuma</i>                                                                                 | in vitro | [45] |
| <i>Rumex abyssinicus</i> (Leaf and stem) | <i>Haemonchus contortus</i>                                                                               | in vitro | [55] |
| <i>Cassia alata</i>                      | <i>Haemonchus contortus</i>                                                                               | in vitro | [56] |

|                                 |                                                                                                                        |                      |         |
|---------------------------------|------------------------------------------------------------------------------------------------------------------------|----------------------|---------|
| <i>Clitoria ternatea</i>        | <i>Eisenia foetida</i> , <i>Raillietina spiralis</i> ,<br><i>Ascaridia galli</i>                                       | in vitro             | [57]    |
| <i>Senna occidentalis</i>       | <i>Haemonchus contortus</i>                                                                                            | in vitro             | [55]    |
| <i>Leucas martinicensis</i>     | <i>Haemonchus contortus</i>                                                                                            | in vitro             | [55]    |
| <i>Leonotis ocymifolia</i>      | <i>Haemonchus contortus</i>                                                                                            | in vitro             | [55]    |
| <i>Albizia schimperiana</i>     | <i>Haemonchus contortus</i>                                                                                            | in vitro             | [55]    |
| <i>Linospora Cordifolia</i>     | <i>Eisenia foetida</i>                                                                                                 | in vitro             | [58]    |
| <i>Agave sisalana</i>           | Gastrointestinal nematodes of goat                                                                                     | in vivo and in vitro | [59-62] |
| <i>Lannea barteri</i>           | <i>Echinostoma caproni</i> <i>Schistosoma</i><br><i>mansoni</i> <i>Heligmosomoides bakeri</i><br><i>Trichuris muri</i> | in vitro             | [14]    |
| <i>Sclerocarya birrea</i>       | <i>Echinostoma caproni</i> <i>Schistosoma</i><br><i>mansoni</i> <i>Heligmosomoides bakeri</i><br><i>Trichuris muri</i> | in vitro             | [14]    |
| <i>Xylopi aethiopica</i>        | <i>Echinostoma caproni</i> <i>Schistosoma</i><br><i>mansoni</i> <i>Heligmosomoides bakeri</i><br><i>Trichuris muri</i> | in vitro             | [14]    |
| <i>Parinari curatellifolia</i>  | <i>Echinostoma caproni</i> <i>Schistosoma</i><br><i>mansoni</i> <i>Heligmosomoides bakeri</i><br><i>Trichuris muri</i> | in vitro             | [14]    |
| <i>Parinari excelsa</i>         | <i>Echinostoma caproni</i> <i>Schistosoma</i><br><i>mansoni</i> <i>Heligmosomoides bakeri</i><br><i>Trichuris muri</i> | in vitro             | [14]    |
| <i>Anogeissus leiocarpus</i>    | <i>Echinostoma caproni</i> <i>Schistosoma</i><br><i>mansoni</i> <i>Heligmosomoides bakeri</i><br><i>Trichuris muri</i> | in vitro             | [14]    |
| <i>Combretum mucronatum</i>     | <i>Echinostoma caproni</i> <i>Schistosoma</i><br><i>mansoni</i> <i>Heligmosomoides bakeri</i><br><i>Trichuris muri</i> | in vitro             | [14]    |
| <i>Terminalia avicennioides</i> | <i>Echinostoma caproni</i> <i>Schistosoma</i><br><i>mansoni</i> <i>Heligmosomoides bakeri</i><br><i>Trichuris muri</i> | in vitro             | [14]    |

|                                 |                                                                                                            |          |      |
|---------------------------------|------------------------------------------------------------------------------------------------------------|----------|------|
| <i>Monotes kerstingii</i>       | <i>Echinostoma caproni</i> <i>Schistosoma mansonii</i> <i>Heligmosomoides bakeri</i> <i>Trichuris muri</i> | in vitro | [14] |
| <i>Anthostema senegalenseis</i> | <i>Echinostoma caproni</i> <i>Schistosoma mansonii</i> <i>Heligmosomoides bakeri</i> <i>Trichuris muri</i> | in vitro | [14] |
| <i>Milbraedia paniculata</i>    | <i>Echinostoma caproni</i> <i>Schistosoma mansonii</i> <i>Heligmosomoides bakeri</i> <i>Trichuris muri</i> | in vitro | [14] |
| <i>Eriosema griseum</i>         | <i>Echinostoma caproni</i> <i>Schistosoma mansonii</i> <i>Heligmosomoides bakeri</i> <i>Trichuris muri</i> | in vitro | [14] |
| <i>Erythrina senegalensis</i>   | <i>Echinostoma caproni</i> <i>Schistosoma mansonii</i> <i>Heligmosomoides bakeri</i> <i>Trichuris muri</i> | in vitro | [14] |
| <i>Piliostigma thonningii</i>   | <i>Echinostoma caproni</i> <i>Schistosoma mansonii</i> <i>Heligmosomoides bakeri</i> <i>Trichuris muri</i> | in vitro | [14] |
| <i>Sacoglottis gabonensis</i>   | <i>Echinostoma caproni</i> <i>Schistosoma mansonii</i> <i>Heligmosomoides bakeri</i> <i>Trichuris muri</i> | in vitro | [14] |
| <i>Napoleona vogelii</i>        | <i>Echinostoma caproni</i> <i>Schistosoma mansonii</i> <i>Heligmosomoides bakeri</i> <i>Trichuris muri</i> | in vitro | [14] |
| <i>Flabellaria paniculata</i>   | <i>Echinostoma caproni</i> <i>Schistosoma mansonii</i> <i>Heligmosomoides bakeri</i> <i>Trichuris muri</i> | in vitro | [14] |
| <i>Pseudocedrela kotsstchyi</i> | <i>Echinostoma caproni</i> <i>Schistosoma mansonii</i> <i>Heligmosomoides bakeri</i> <i>Trichuris muri</i> | in vitro | [14] |



|                                                    |                                                                                                                                                          |                      |         |
|----------------------------------------------------|----------------------------------------------------------------------------------------------------------------------------------------------------------|----------------------|---------|
| <i>Olax subscorpioidea</i>                         | <i>Echinostoma caproni</i> <i>Schistosoma mansoni</i> <i>Heligmosomoides bakeri</i> <i>Trichuris muri</i>                                                | in vitro             | [14]    |
| <i>Securidaca longepedunculata</i>                 | <i>Echinostoma caproni</i> <i>Schistosoma mansoni</i> <i>Heligmosomoides bakeri</i> <i>Trichuris muri</i> Mouse model - <i>Heligmosomoides polygyrus</i> | in vitro and in vivo | [14,63] |
| <i>Craterispermum caudatum</i>                     | <i>Echinostoma caproni</i> <i>Schistosoma mansoni</i> <i>Heligmosomoides bakeri</i> <i>Trichuris muri</i>                                                | in vitro             | [14]    |
| <i>Crossopteryx febrifuga</i>                      | <i>Echinostoma caproni</i> <i>Schistosoma mansoni</i> <i>Heligmosomoides bakeri</i> <i>Trichuris muri</i>                                                | in vitro             | [14]    |
| <i>Morinda longiflora</i>                          | <i>Echinostoma caproni</i> <i>Schistosoma mansoni</i> <i>Heligmosomoides bakeri</i> <i>Trichuris muri</i>                                                | in vitro             | [14]    |
| <i>Sarcocephalus latifoliaus</i>                   | <i>Echinostoma caproni</i> <i>Schistosoma mansoni</i> <i>Heligmosomoides bakeri</i> <i>Trichuris muri</i>                                                | in vitro             | [14]    |
| <i>Mimusops kummel</i>                             | <i>Echinostoma caproni</i> <i>Schistosoma mansoni</i> <i>Heligmosomoides bakeri</i> <i>Trichuris muri</i>                                                | in vitro             | [14]    |
| <i>Starchytarpheta cayennensis</i>                 | <i>Echinostoma caproni</i> <i>Schistosoma mansoni</i> <i>Heligmosomoides bakeri</i> <i>Trichuris muri</i>                                                | in vitro             | [14]    |
| <i>Leonurus sibiricus</i>                          | <i>Pheritima posthuma</i>                                                                                                                                | in vitro             | [14]    |
| <i>Vitex Negundo</i>                               | <i>Pheritima posthuma</i>                                                                                                                                | in vitro             | [64]    |
| <i>Piper betle</i> Linn                            | <i>Pheritima posthuma</i>                                                                                                                                | in vitro             | [65]    |
| <i>Euphorbia helioscopia</i> (leaf, stem and root) | Sheep - Gastrointestinal nematodes <i>Haemonchus contortus</i>                                                                                           | in vitro and in vivo | [66,67] |
| <i>Clerodendrum colebrookianum</i>                 | Rat - <i>Hymenolepis diminuta</i>                                                                                                                        | in vivo              | [68]    |

|                                    |                                                  |          |      |
|------------------------------------|--------------------------------------------------|----------|------|
| <i>Phytolacca icosandra</i>        | <i>Haemonchus contortus</i>                      | in vivo  | [69] |
| <i>Asystasia gangeticum</i>        | <i>Pheritima posthuma</i> <i>Ascaridia galli</i> | in vitro | [70] |
| <i>Calamus Leptospadix</i> (Seed)  | <i>Pheritima posthuma</i>                        | in vitro | [71] |
| <i>Parthenium hysterophorus</i>    | <i>Pheritima posthuma</i>                        | in vitro | [72] |
| <i>Epiprinus mallotiformis</i>     | <i>Pheritima posthuma</i>                        | in vitro | [73] |
| <i>Robinia pseudoacacia</i>        | <i>Caenorhabditis elegans</i>                    | in vitro | [74] |
| <i>Quercus alba</i>                | <i>Caenorhabditis elegans</i>                    | in vitro | [74] |
| <i>Lespedeza cuneata</i>           | <i>Caenorhabditis elegans</i>                    | in vitro | [74] |
| <i>Salix X sepulcralis</i>         | <i>Caenorhabditis elegans</i>                    | in vitro | [74] |
| <i>Rosa multiflora</i>             | <i>Caenorhabditis elegans</i>                    | in vitro | [74] |
| <i>Acer rubrum</i>                 | <i>Caenorhabditis elegans</i>                    | in vitro | [74] |
| <i>Rhus typhina</i>                | <i>Caenorhabditis elegans</i>                    | in vitro | [74] |
| <i>Flacourtia sepiaria</i>         | <i>Pheritima posthuma</i>                        | in vitro | [75] |
| <i>Cymbopogo citratus</i>          | <i>Pheritima posthuma</i>                        | in vitro | [76] |
| <i>Polygonum lapathifolium</i>     | <i>Pheritima posthuma</i>                        | in vitro | [77] |
| <i>Zingiber officinale</i>         | <i>Ascaridia galli</i> in Chicken model          | in vivo  | [35] |
| <i>Avicennia germinans</i>         | <i>Haemonchus contortus</i>                      | in vitro | [78] |
| <i>Lysiloma latisiliquum</i>       | <i>Haemonchus contortus</i>                      | in vitro | [78] |
| <i>Theobroma cacao</i>             | <i>Haemonchus contortus</i>                      | in vitro | [78] |
| <i>Rhizophora mangle</i>           | <i>Haemonchus contortus</i>                      | in vitro | [78] |
| <i>Laguncularia racemosa</i>       | <i>Haemonchus contortus</i>                      | in vitro | [78] |
| <i>Linariantha bicolor</i>         | <i>Caenorhabditis elegans</i>                    | in vitro | [79] |
| <i>Lansium domesticum</i>          | <i>Caenorhabditis elegans</i>                    | in vitro | [79] |
| <i>Picria fel-terrae</i>           | <i>Caenorhabditis elegans</i>                    | in vitro | [79] |
| <i>Rhus aromatica</i>              | <i>Haemonchus contortus</i>                      | in vitro | [80] |
| <i>Perideridia gairdneri</i>       | <i>Haemonchus contortus</i>                      | in vitro | [80] |
| <i>Chrysanthamnus viscidiflora</i> | <i>Haemonchus contortus</i>                      | in vitro | [80] |
| <i>Liatris punctata</i>            | <i>Haemonchus contortus</i>                      | in vitro | [80] |
| <i>Ericameria nauseosa</i>         | <i>Haemonchus contortus</i>                      | in vitro | [80] |
| <i>Melilotus alba</i>              | <i>Haemonchus contortus</i>                      | in vitro | [80] |
| <i>Melilotus officinalis</i>       | <i>Haemonchus contortus</i>                      | in vitro | [80] |

|                                 |                                                     |          |      |
|---------------------------------|-----------------------------------------------------|----------|------|
| <i>Geranium viscosissimum</i>   | <i>Haemonchus contortus</i>                         | in vitro | [80] |
| <i>Enhydra fluctuans</i>        | <i>Pheritima posthuma</i>                           | in vitro | [81] |
| <i>Spilanthus calva</i>         | <i>Ascaridia galli</i><br><i>Pheritima posthuma</i> | in vitro | [82] |
| <i>Heliotropium</i>             | <i>Pheritima posthuma</i>                           | in vitro | [83] |
| <i>Momordica charantia</i>      | <i>Caenorhabditis elegans</i>                       | in vitro | [84] |
| <i>Eucalyptus globulus</i>      | Sheep - Gastrointestinal nematodes                  | in vivo  | [85] |
| <i>Terminalia citrina</i>       | <i>Pheretima posthuma</i>                           | in vitro | [86] |
| <i>Anacardium occidentale</i>   | <i>Ascaridia galli</i>                              | in vitro | [87] |
| <i>Allium sativum</i>           | <i>Ascaridia galli</i>                              | in vitro | [87] |
| <i>Tribulus terrestris,</i>     | <i>Ascaridia galli</i>                              | in vitro | [87] |
| <i>Bassia latifolia</i>         | <i>Ascaridia galli</i>                              | in vitro | [87] |
| <i>Piper betle</i>              | <i>Ascaridia galli</i>                              | in vitro | [87] |
| <i>Morinda citrifolia</i> L     | <i>Ascaridia galli</i>                              | in vitro | [87] |
| <i>Aloe secundiflora</i>        | <i>Ascaridia galli</i>                              | in vitro | [87] |
| <i>Cassia occidentalis</i> L    | <i>Ascaridia galli</i>                              | in vitro | [87] |
| <i>Psorelia corylifolia</i>     | <i>Ascaridia galli</i> in birds                     | in vivo  | [87] |
| <i>Piper betle</i>              | <i>Ascaridia galli</i> in birds                     | in vivo  | [87] |
| <i>Pilostigma thonningi</i>     | <i>Ascaridia galli</i> in birds                     | in vivo  | [87] |
| <i>Caesalpinia crista</i>       | <i>Ascaridia galli</i> in birds                     | in vivo  | [87] |
| <i>Ocimum gratissimum</i>       | <i>Ascaridia galli</i> in birds                     | in vivo  | [87] |
| <i>Anacardium occidentale</i>   | <i>Ascaridia galli</i> in birds                     | in vivo  | [87] |
| <i>Moringa oleifera</i>         | <i>Haemonchus contortus</i>                         | in vitro | [88] |
| <i>Alangium. salviifolium,</i>  | <i>Caenorhabditis elegans</i>                       | in vitro | [88] |
| <i>Antidesma. buniis,</i>       | <i>Caenorhabditis elegans</i>                       | in vitro | [88] |
| <i>Aporosa octandra,</i>        | <i>Caenorhabditis elegans</i>                       | in vitro | [88] |
| <i>Barringtonia acutangula,</i> | <i>Caenorhabditis elegans</i>                       | in vitro | [88] |
| <i>Casearia graveolens</i>      | <i>Caenorhabditis elegans</i>                       | in vitro | [88] |
| <i>Crotalaria. pallida</i>      | <i>Caenorhabditis elegans</i>                       | in vitro | [88] |
| <i>Gmelina arborea,</i>         | <i>Caenorhabditis elegans</i>                       | in vitro | [88] |
| <i>Holarrhera pubescens</i>     | <i>Caenorhabditis elegans</i>                       | in vitro | [88] |
| <i>Hypericum gaitii</i>         | <i>Caenorhabditis elegans</i>                       | in vitro | [88] |

|                                   |                                    |                      |      |
|-----------------------------------|------------------------------------|----------------------|------|
| <i>Lannea coromandelica</i>       | <i>Caenorhabditis elegans</i>      | in vitro             | [88] |
| <i>Macaranga peltata</i>          | <i>Caenorhabditis elegans</i>      | in vitro             | [88] |
| <i>Melastoma malabathricum</i>    | <i>Caenorhabditis elegans</i>      | in vitro             | [88] |
| <i>Millettia extensa</i>          | <i>Caenorhabditis elegans</i>      | in vitro             | [88] |
| <i>Nyctanthes arbor-tristis</i>   | <i>Caenorhabditis elegans</i>      | in vitro             | [88] |
| <i>Proteum. serratum</i>          | <i>Caenorhabditis elegans</i>      | in vitro             | [88] |
| <i>Pterospermum acerifolium</i>   | <i>Caenorhabditis elegans</i>      | in vitro             | [88] |
| <i>Rubus ellipticus</i>           | <i>Caenorhabditis elegans</i>      | in vitro             | [88] |
| <i>Suregada multiflora</i>        | <i>Caenorhabditis elegans</i>      | in vitro             | [88] |
| <i>Symplocos cochinchinensis</i>  | <i>Caenorhabditis elegans</i>      | in vitro             | [88] |
| <i>Ventilago maderaspatana</i>    | <i>Caenorhabditis elegans</i>      | in vitro             | [88] |
| <i>Wrightia arborea</i>           | <i>Caenorhabditis elegans</i>      | in vitro             | [88] |
| <i>Annona squamosa</i>            | <i>Pheretima posthuma</i>          | in vitro             | [89] |
| <i>Azadirachta Indica</i>         | <i>Pheretima posthuma</i>          | in vitro             | [89] |
| <i>Punica granatum</i>            | <i>Pheretima posthuma</i>          | in vitro             | [89] |
| <i>Nepeta cadmea</i>              | <i>Tubifex tubifex</i>             | in vitro             | [90] |
| <i>Artemisia absinthium</i>       | <i>Haemonchus contortus</i>        | in vitro             | [91] |
| <i>Chamomilla recutita</i>        | <i>Haemonchus contortus</i>        | in vitro             | [91] |
| <i>Malva sylvestris</i>           | <i>Haemonchus contortus</i>        | in vitro             | [91] |
| <i>Leea aequata</i>               | <i>Pheretima posthuma</i>          | in vitro             | [92] |
| <i>Ficus insipida latex</i>       | Monogeneans                        | in vitro             | [93] |
| <i>Cryptocarya novoguineensis</i> | <i>Haemonchus contortus</i>        | in vitro             | [94] |
| <i>Piper methysticum</i>          | <i>Haemonchus contortus</i>        | in vitro             | [94] |
| <i>Cassia occidentalis</i>        | Gastrointestinal nematodes of goat | in vitro and in vivo | [95] |
| <i>Euphorbia hirta</i>            | Gastrointestinal nematodes of goat | in vitro and in vivo | [95] |

1. McGaw, L.J.; Jäger, A.K.; Van Staden, J. Antibacterial, anthelmintic and anti-amoebic activity in South African medicinal plants. *Journal of Ethnopharmacology* **2000**, *72*, 247-263, doi:10.1016/S0378-8741(00)00269-5.
2. Sparg, S.G.; Van Staden, J.; Jäger, A.K. Efficiency of traditionally used South African plants against schistosomiasis. *Journal of Ethnopharmacology* **2000**, doi:10.1016/S0378-8741(00)00310-X.

3. Fakae, B.B.; Campbell, A.M.; Barrett, J.; Scott, I.M.; Teesdale-Spittle, P.H.; Liebau, E.; Brophy, P.M. Inhibition of glutathione S-transferases (GSTs) from parasitic nematodes by extracts from traditional Nigerian medicinal plants. *Phytotherapy Research* **2000**, *14*, 630-634, doi:10.1002/1099-1573(200012)14:8<630::AID-PTR773>3.0.CO;2-5.
4. Ajaiyeoba, E.O.; Onocha, P.A.; Olarenwaju, O.T. In vitro Anthelmintic Properties of Buchholzia coriacea and Gynandropsis gynandra Extracts. *Pharmaceutical Biology* **2001**, doi:10.1076/phbi.39.3.217.5936.
5. McGaw, L.J.; Rabe, T.; Sparg, S.G.; Jäger, A.K.; Eloff, J.N.; Van Staden, J. An investigation on the biological activity of Combretum species. *Journal of Ethnopharmacology* **2001**, doi:10.1016/S0378-8741(00)00405-0.
6. Enwerem, N.M.; Okogun, J.I.; Wambebe, C.O.; Okorie, D.A.; Akah, P.A. Anthelmintic activity of the stem bark extracts of Berlina grandiflora and one of its active principles, betulinic acid. *Phytomedicine* **2001**, doi:10.1078/0944-7113-00023.
7. Mølgaard, P.; Nielsen, S.B.; Rasmussen, D.E.; Drummond, R.B.; Makaza, N.; Andreassen, J. Anthelmintic screening of Zimbabwean plants traditionally used against schistosomiasis. *Journal of Ethnopharmacology* **2001**, *74*, 257-264, doi:10.1016/S0378-8741(00)00377-9.
8. Dash, G.K.; Suresh, P.; Sahu, S.K.; Kar, D.M.; Ganapaty, S.; Panda, S.B. Evaluation of Evolvulus alsinoides Linn. for anthelmintic and antimicrobial activities. *Journal of Natural Remedies* **2002**, *2*, 182-185.
9. Githiori, J.B.; Höglund, J.; Waller, P.J.; Baker, R.L. Anthelmintic activity of preparations derived from Myrsine africana and Rapanea melanophloeos against the nematode parasite, Haemonchus contortus, of sheep. *Journal of Ethnopharmacology* **2002**, *80*, 187-191, doi:10.1016/S0378-8741(02)00030-2.
10. Alawa, C.B.I.; Adamu, A.M.; Gefu, J.O.; Ajanusi, O.J.; Abdu, P.A.; Chiezey, N.P.; Alawa, J.N.; Bowman, D.D. In vitro screening of two Nigerian medicinal plants (Vernonia amygdalina and Annona senegalensis) for anthelmintic activity. *Veterinary Parasitology* **2003**, *113*, 73-81, doi:10.1016/S0304-4017(03)00040-2.
11. Ademola, I.O.; Eloff, J.N. Ovicidal and larvicidal activity of Cassia alata leaf acetone extract and fractions on Haemonchus contortus: In vitro studies. *Pharmaceutical Biology* **2011**, doi:10.3109/13880209.2010.526948.
12. Githiori, J.B.; Höglund, J.; Waller, P.J.; Baker, R.L. Evaluation of anthelmintic properties of extracts from some plants used as livestock dewormers by pastoralist and smallholder farmers in Kenya against Heligmosomoides polygyrus infections in mice. *Veterinary Parasitology* **2003**, doi:10.1016/j.vetpar.2003.10.006.
13. Ademola, I.O.; Fagbemi, B.O.; Idowu, S.O. Evaluation of the anthelmintic activity of Khaya senegalensis extract against gastrointestinal nematodes of sheep: In vitro and in vivo studies. *Veterinary Parasitology* **2004**, doi:10.1016/j.vetpar.2004.04.001.

14. Koné, W.M.; Vargas, M.; Keiser, J. Anthelmintic activity of medicinal plants used in Côte d'Ivoire for treating parasitic diseases. *Parasitology Research* **2012**, doi:10.1007/s00436-011-2771-z.
15. Ndjonka, D.; Agyare, C.; Lüersen, K.; Djafsia, B.; Achukwi, D.; Nukenine, E.N.; Hensel, A.; Liebau, E. In vitro activity of Cameroonian and Ghanaian medicinal plants on parasitic (*Onchocerca ochengi*) and free-living (*Caenorhabditis elegans*) nematodes. *Journal of Helminthology* **2011**, doi:10.1017/S0022149X10000635.
16. Iqbal, Z.; Lateef, M.; Ashraf, M.; Jabbar, A. Anthelmintic activity of *Artemisia brevifolia* in sheep. *Journal of Ethnopharmacology* **2004**, doi:10.1016/j.jep.2004.03.046.
17. McGaw, L.J.; Eloff, J.N. Screening of 16 poisonous plants for antibacterial, anthelmintic and cytotoxic activity in vitro. *South African Journal of Botany* **2005**, doi:10.1016/S0254-6299(15)30102-2.
18. Barrau, E.; Fabre, N.; Fouraste, I.; Hoste, H. Effect of bioactive compounds from Sainfoin (*Onobrychis viciifolia* Scop.) on the in vitro larval migration of *Haemonchus contortus*: Role of tannins and flavonol glycosides. *Parasitology* **2005**, doi:10.1017/S0031182005008024.
19. Ademola, I.O.; Akanbi, A.I.; Idowu, S.O. Comparative nematocidal activity of chromatographic fractions of *Leucaena leucocephala* seed against gastrointestinal sheep nematodes. *Pharmaceutical Biology* **2005**, *43*, 599-604, doi:10.1080/13880200500301761.
20. Hymete, A.; Iversen, T.-H.; Rohloff, J.; Erko, B. Screening of *Echinops ellenbeckii* and *Echinops longisetus* for biological activities and chemical constituents. *Phytomedicine* **2005**, *12*, 675-679, doi:10.1016/j.phymed.2004.01.013.
21. Wasswa, P.; Olila, D. The in-vitro ascaricidal activity of selected indigenous medicinal plants used in ethno veterinary practices in Uganda. *African Journal of Traditional, Complementary and Alternative Medicines* **2006**, doi:10.4314/ajtcam.v3i2.31150.
22. Bizimenyera, E.S.; Githiori, J.B.; Eloff, J.N.; Swan, G.E. In vitro activity of *Peltophorum africanum* Sond. (Fabaceae) extracts on the egg hatching and larval development of the parasitic nematode *Trichostrongylus colubriformis*. *Veterinary Parasitology* **2006**, doi:10.1016/j.vetpar.2006.06.013.
23. Iqbal, Z.; Lateef, M.; Khan, M.N.; Jabbar, A.; Akhtar, M.S. Anthelmintic activity of *Swertia chirata* against gastrointestinal nematodes of sheep. *Fitoterapia* **2006**, doi:10.1016/j.fitote.2006.05.010.
24. Eguale, T.; Tilahun, G.; Debella, A.; Feleke, A.; Makonnen, E. In vitro and in vivo anthelmintic activity of crude extracts of *Coriandrum sativum* against *Haemonchus contortus*. *Journal of Ethnopharmacology* **2007**, doi:10.1016/j.jep.2006.10.003.

25. Hong, L.; Li, G.; Zhou, W.; Wang, X.; Zhang, K. Screening and isolation of a nematocidal sesquiterpene from *Magnolia grandiflora* L. *Pest Management Science* **2007**, doi:10.1002/ps.1337.
26. Nirmal, S.A.; Malwadkar, G.; Laware, R.B. Anthelmintic activity of *Pongamia glabra*. *Songklanakarin Journal of Science and Technology* **2007**.
27. McGaw, L.J.; Van der Merwe, D.; Eloff, J.N. In vitro anthelmintic, antibacterial and cytotoxic effects of extracts from plants used in South African ethnoveterinary medicine. *Veterinary Journal* **2007**, 173, 366-372, doi:10.1016/j.tvjl.2005.09.004.
28. Jabbar, A.; Zaman, M.A.; Iqbal, Z.; Yaseen, M.; Shamim, A. Anthelmintic activity of *Chenopodium album* (L.) and *Caesalpinia crista* (L.) against trichostrongylid nematodes of sheep. *Journal of Ethnopharmacology* **2007**, 114, 86-91, doi:10.1016/j.jep.2007.07.027.
29. Dwivedi, S.; Dwivedi, A.; Kapadia, R.; Kaul, S. Anthelmintic Activity of Alcoholic and Aqueous Extract of Fruits of *Terminalia*. *Ethnobotanical Leaflets* **2008**, 12, 741-743.
30. Kamaraj, C.; Rahuman, A.A.; Elango, G.; Bagavan, A.; Zahir, A.A. Anthelmintic activity of botanical extracts against sheep gastrointestinal nematodes, *Haemonchus contortus*. *Parasitology Research* **2011**, doi:10.1007/s00436-010-2218-y.
31. Costa, C.T.C.; Bevilacqua, C.M.L.; Camurça-Vasconcelos, A.L.F.; Maciel, M.V.; Morais, S.M.; Castro, C.M.S.; Braga, R.R.; Oliveira, L.M.B. In vitro ovicidal and larvicidal activity of *Azadirachta indica* extracts on *Haemonchus contortus*. *Small Ruminant Research* **2008**, doi:10.1016/j.smallrumres.2007.09.003.
32. Aswar, M.; Aswar, U.; Watkar, B.; Vyas, M.; Wagh, A.; Gujar, K. Anthelmintic activity of *Ficus bengalensis*. *International Journal of Green Pharmacy* **2008**, 2, 170-172.
33. Sawarkar, H.A.; Singh, M.K.; Pandey, A.K.; Biswas, D. In vitro anthelmintic activity of *Ficus Benghalensis*, *Ficus Carica* & *Ficus Religiosa*: A comparative study. *International Journal of Pharmacy and Pharmaceutical Sciences* **2011**, 3, 152-153.
34. Atjanasuppat, K.; Wongkham, W.; Meepowpan, P.; Kittakoop, P.; Sobhon, P.; Bartlett, A.; Whitfield, P.J. In vitro screening for anthelmintic and antitumour activity of ethnomedicinal plants from Thailand. *Journal of Ethnopharmacology* **2009**, 123, 475-482, doi:10.1016/j.jep.2009.03.010.
35. Bazh, E.K.A.; El-Bahy, N.M. In vitro and in vivo screening of anthelmintic activity of ginger and curcumin on *Ascaridia galli*. *Parasitology Research* **2013**, doi:10.1007/s00436-013-3541-x.

36. Oliveira, L.M.B.; Bevilaqua, C.M.L.; Costa, C.T.C.; Macedo, I.T.F.; Barros, R.S.; Rodrigues, A.C.M.; Camurça-Vasconcelos, A.L.F.; Morais, S.M.; Lima, Y.C.; Vieira, L.S.; et al. Anthelmintic activity of *Cocos nucifera* L. against sheep gastrointestinal nematodes. *Veterinary Parasitology* **2009**, doi:10.1016/j.vetpar.2008.10.018.
37. Bachaya, H.A.; Iqbal, Z.; Khan, M.N.; Sindhu, Z.u.D.; Jabbar, A. Anthelmintic activity of *Ziziphus nummularia* (bark) and *Acacia nilotica* (fruit) against *Trichostrongylid* nematodes of sheep. *Journal of Ethnopharmacology* **2009**, doi:10.1016/j.jep.2009.02.043.
38. Kosalge, S.B.; Fursule, R.A. Investigation of anthelmintic potential of some plants claimed by tribals of satpuda hills. *International Journal of PharmTech Research* **2009**.
39. Taran, M.; Azizi, E.; Shikhvaisi, A.; Asadi, N. The anthelmintic effect of *Pistacia khinjuk* against protoscoleces of *Echinococcus granulosus*. *World Journal of Zoology* **2009**, 4, 291-295.
40. Deore, S.L.; Khadabadi, S.S.; Kamdi, K.S.; Ingle, V.P.; Kawalkar, N.G.; Sawarkar, P.S.; Patil, U.A.; Vyas, A.J. In vitro anthelmintic activity of *Cassia tora*. *International Journal of ChemTech Research* **2009**.
41. Quesada Romero, L.F.; Castaño Osorio, J.C.; Bilbao, M. Efecto antiparasitario de los extractos etanólicos y etéreos de *Ficus obtusifolia* Kunth (Moraceae), frente a parásitos de clase nematodos (*Toxocara cati* y *Toxocara canis*). *Infectio* **2009**, 13, 259-267, doi:10.1016/S0123-9392(09)70157-2.
42. Aremu, A.O.; Ndhlala, A.R.; Fawole, O.A.; Light, M.E.; Finnie, J.F.; Van Staden, J. In vitro pharmacological evaluation and phenolic content of ten South African medicinal plants used as anthelmintics. *South African Journal of Botany* **2010**, doi:10.1016/j.sajb.2010.04.009.
43. Dwivedi, G.; Rawal, D.; Nagda, S.; Jain, T. Anthelmintic activity of Tea (*Camellia sinensis*) extract. *Int J Pharm Sci* **2010**, 1, 451-453.
44. Das, J.K.; Choudhury, S.; Adhikary, S. Anthelmintic activity of *Clerodendrum viscosum*. *Oriental Pharmacy and Experimental Medicine* **2011**, doi:10.1007/s13596-011-0021-7.
45. Basha, S.N.; Rekha, R.; Saleh, S.; Yemane, S. Evaluation of Invitro anthelmintic activities of *Brassica nigra*, *Ocimum basilicum* and *Rumex abyssinicus*. *Pharmacognosy Journal* **2011**, doi:10.5530/pj.2011.20.17.
46. Mulla, W.A.; Thorat, V.S.; Patil, R.V.; Burade, K.B. Anthelmintic activity of leaves of *Alocasia indica* Linn. *International Journal of PharmTech Research* **2010**.



47. Patil, S.H.; Sreenivas, S.A.; Deshmukh, P.V.; Srikanth, M.; Choudhury, A.; Wagh, A.E.; Vijapur, L.S. Anthelmintic activity of *Alocasia indica* Schott. rootstocks. *International Journal of Drug Development and Research* **2012**.
48. Maphosa, V.; Masika, P.J.; Bizimenyera, E.S.; Eloff, J.N. In-vitro anthelminthic activity of crude aqueous extracts of *Aloe ferox*, *Leonotis leonurus* and *Elephantorrhiza elephantina* against *Haemonchus contortus*. *Tropical Animal Health and Production* **2010**, 42, 301-307, doi:10.1007/s11250-009-9421-9.
49. Nayak, P.S.; Nayak, S.; Kar, D.M.; Das, P. In vitro anthelmintic activity of whole plant extracts of *Hyptis suaveolens* poit. *International Journal of Current Pharmaceutical Research* **2010**.
50. Sangeetha, J.; Soundarya, K.; Santhosh, K.; Sindhura, C. Evaluation of in-vitro anthelmentic property of *Passiflora edulis* Linn. *Research Journal of Pharmaceutical, Biological and Chemical Sciences* **2010**.
51. Katak, M.S.; Sharma, D.N.; Kumar, S.; Yadav, R.S.; Rajkumari, A. Antibacterial activity , in vitro antioxidant activity and anthelmintic activity of methanolic extract of *Plumbago zeylanica* L . leaves. *Journal of Pharmacy Research* **2010**, 3, 2908 - 2912.
52. Hussain, A.; Khan, M.N.; Iqbal, Z.; Sajid, M.S.; Khan, M.K. Anthelmintic activity of *Trianthema portulacastrum* L. and *Musa paradisiaca* L. against gastrointestinal nematodes of sheep. *Veterinary Parasitology* **2011**, doi:10.1016/j.vetpar.2011.02.022.
53. Liu, F.; Yang, Z.; Zheng, X.; Luo, S.; Zhang, K.; Li, G. Nematicidal coumarin from *Ficus carica* L. *Journal of Asia-Pacific Entomology* **2011**, doi:10.1016/j.aspen.2010.10.006.
54. Nchu, F.; Githiori, J.B.; McGaw, L.J.; Eloff, J.N. Anthelmintic and cytotoxic activities of extracts of *Markhamia obtusifolia* Sprague (Bignoniaceae). *Veterinary Parasitology* **2011**, doi:10.1016/j.vetpar.2011.06.017.
55. Eguale, T.; Tadesse, D.; Giday, M. In vitro anthelmintic activity of crude extracts of five medicinal plants against egg-hatching and larval development of *Haemonchus contortus*. *Journal of Ethnopharmacology* **2011**, doi:10.1016/j.jep.2011.04.063.
56. Ademola, I.O.; Eloff, J.N. Anthelminthic activity of acetone extract and fractions of *Vernonia amygdalina* against *Haemonchus contortus* eggs and larvae. *Tropical Animal Health and Production* **2011**, 43, 521-527, doi:10.1007/s11250-010-9727-7.
57. Salhan, M.; Kumar, B.; Tiwari, P.; Sharma, P.; Sandhar, H.K.; Gautam, M. Comparative anthelmintic activity of aqueous and ethanolic leaf extracts of *Clitoria ternatea*. *International Journal of Drug Development and Research* **2011**.
58. Tiwari, P.; Kumar, B.; Kumar, M.; Kaur, M.; Debnath, J.; Sharma, P. Comparative anthelmintic activity of aqueous and ethanolic stem extract of *Iinospora cordifolia*. *International Journal of Drug Development and Research* **2011**.

59. Botura, M.B.; Silva, G.D.; Lima, H.G.; Oliveira, J.V.A.; Souza, T.S.; Santos, J.D.G.; Branco, A.; Moreira, E.L.T.; Almeida, M.A.O.; Batatinha, M.J.M. In vivo anthelmintic activity of an aqueous extract from sisal waste (*Agave sisalana* Perr.) against gastrointestinal nematodes in goats. *Veterinary Parasitology* **2011**, doi:10.1016/j.vetpar.2010.11.039.
60. Botura, M.B.; dos Santos, J.D.G.; da Silva, G.D.; de Lima, H.G.; de Oliveira, J.V.A.; de Almeida, M.A.O.; Batatinha, M.J.M.; Branco, A. In vitro ovicidal and larvicidal activity of *Agave sisalana* Perr. (sisal) on gastrointestinal nematodes of goats. *Veterinary Parasitology* **2013**, doi:10.1016/j.vetpar.2012.10.012.
61. Domingues, L.F.; Botura, M.B.; Cruz, A.C.F.G.D.; Yuki, C.C.; Silva, G.D.D.; Costa, M.S.; Murphy, G.; Moreira, E.L.T.; Meneses, I.D.S.D.; Almeida, M.D.G.Á.R.D.; et al. Evaluation of anthelmintic activity of liquid waste of *Agave sisalana* (sisal) in goats. *Revista brasileira de parasitologia veterinaria = Brazilian journal of veterinary parasitology : Orgao Oficial do Colegio Brasileiro de Parasitologia Veterinaria* **2010**, doi:10.1590/S1984-29612010000400018.
62. Silveira, R.X.; Chagas, A.C.S.; Botura, M.B.; Batatinha, M.J.M.; Katiki, L.M.; Carvalho, C.O.; Bevilaqua, C.M.L.; Branco, A.; Machado, E.A.A.; Borges, S.L.; et al. Action of sisal (*Agave sisalana*, Perrine) extract in the in vitro development of sheep and goat gastrointestinal nematodes. *Experimental Parasitology* **2012**, doi:10.1016/j.exppara.2012.03.018.
63. Adiele, R.C.; Fakae, B.B.; Isuzu, I.U. Anthelmintic activity of *Securidaca longepedunculata* (Family: Polygalaceae) root extract in mice, in vitro and in vivo. *Asian Pacific Journal of Tropical Medicine* **2013**, doi:10.1016/S1995-7645(13)60150-9.
64. Rastogi, T.; Bhutda, V.; Moon, K.; Aswar, P.; Khadabadi, S. Comparative Studies on Anthelmintic Activity of *Moringa Oleifera* and *Vitex Negundo*. *Asian Journal of Research in Chemistry* **2009**.
65. Adate, P.S.; Parmesawaran, S.; Chauhan, Y. In vitro Anthelmintic Activity of Stem Extracts of *Piper betle* Linn Against *Pheritima Posthuma*. *Pharmacognosy Journal* **2012**, doi:10.5530/pj.2012.29.10.
66. Lone, B.A.; Chishti, M.Z.; Bhat, F.A.; Tak, H.; Bandh, S.A. In vitro and in vivo anthelmintic activity of *Euphorbia helioscopia* L. *Veterinary Parasitology* **2012**, doi:10.1016/j.vetpar.2012.04.023.
67. Nalule, A.S.; Mbaria, J.M.; Kimenju, J.W. In vitro anthelmintic potential and phytochemical composition of ethanolic and water crude extracts of *Euphorbia heterophylla* Linn. *Journal of Medicinal Plants Research* **2013**, doi:10.5897/jmpr12.1174.
68. Yadav, A.K.; Tangpu, V. Anthelmintic activity of ripe fruit extract of *Solanum myriacanthum* Dunal (Solanaceae) against experimentally induced *Hymenolepis diminuta* (Cestoda) infections in rats. *Parasitology Research* **2012**, 110, 1047-1053, doi:10.1007/s00436-011-2596-9.

69. Hernández-Villegas, M.M.; Borges-Argáez, R.; Rodríguez-Vivas, R.I.; Torres-Acosta, J.F.J.; Méndez-González, M.; Cáceres-Farfán, M. In vivo anthelmintic activity of *Phytolacca icosandra* against *Haemonchus contortus* in goats. *Veterinary Parasitology* **2012**, doi:10.1016/j.vetpar.2012.04.017.
70. Jiju, V.; Gorantla, M.; Chamundeeswari, D. Evaluation of anthelmintic activity of methanolic extract of *Asystasia gangetica*. *Int J Pharm Life Sci* **2013**, 4, 2727-2730.
71. Chakraborty, D.; Borah, S. In-Vitro Anthelmintic Activity Evaluation of Seed Extract of *Calamus leptospadix* Griff. *International Journal of Research in Pharmacy & Science* **2014**, 4.
72. Durga, M.S.S.; Satyavathi, K.; Bhojaraju, P.; Preeti, P.M.; Lovaraju, K.P.; Priya, K.S.; Kumari, Y.R.; Prasad, D.V.; Kanthal, L. Pharmacophore. *Pharmacophore (An International Research Journal)* **2013**, 4, 275-279.
73. Chandrashekar, M.B.; Naika, R.; Vinayaka, K.S.; Joy Hoskeri, H. Evaluation of anthelmintic and antioxidant activities of *Epiprinus mallotiformis* leaf extracts. *Asian Journal of Pharmaceutical and Clinical Research* **2013**.
74. Katiki, L.M.; Ferreira, J.F.S.; Gonzalez, J.M.; Zajac, A.M.; Lindsay, D.S.; Chagas, A.C.S.; Amarante, A.F.T. Anthelmintic effect of plant extracts containing condensed and hydrolyzable tannins on *Caenorhabditis elegans*, and their antioxidant capacity. *Veterinary Parasitology* **2013**, doi:10.1016/j.vetpar.2012.09.030.
75. Sreejith, M.; Kannappan, N.; Santhiagu, A.; Mathew, A.P. Phytochemical, Anti-oxidant and Anthelmintic activities of various leaf extracts of *Flacourtia sepiaria* Roxb. *Asian Pacific Journal of Tropical Biomedicine* **2013**, 3, 947-953, doi:10.1016/S2221-1691(13)60184-7.
76. Sherwani, S.K.; Khan, M.M.; Khan, M.U.; Shah, M.A.; Kazmi, S.U. Evaluation of In Vitro anthelmintic activity of *Cymbopogon citratus* (lemon grass) extract. *International Journal of Pharmacy & Life Sciences* **2013**.
77. Bulbul, L.; Uddin, J.; Sushanta, S.M.; Tanni, S.; Nipa, A.F.; Baul, S. Phytochemical investigation and evaluation of antiemetic & anthelmintic activities of *Polygonum lapathifolium* roots extract. *International Journal of Pharmacy and Life Sciences* **2013**.
78. Vargas-Magaña, J.J.; Torres-Acosta, J.F.J.; Aguilar-Caballero, A.J.; Sandoval-Castro, C.A.; Hoste, H.; Chan-Pérez, J.I. Anthelmintic activity of acetone-water extracts against *Haemonchus contortus* eggs: Interactions between tannins and other plant secondary compounds. *Veterinary Parasitology* **2014**, doi:10.1016/j.vetpar.2014.10.008.
79. Kumarasingha, R.; Palombo, E.A.; Bhave, M.; Yeo, T.C.; Lim, D.S.L.; Tu, C.L.; Shaw, J.M.; Boag, P.R. Enhancing a search for traditional medicinal plants with anthelmintic action by using wild type and stress reporter *Caenorhabditis elegans* strains as screening tools. *International Journal for Parasitology* **2014**, doi:10.1016/j.ijpara.2014.01.008.

80. Acharya, J.; Hildreth, M.B.; Reese, R.N. In vitro screening of forty medicinal plant extracts from the United States Northern Great Plains for anthelmintic activity against *Haemonchus contortus*. *Veterinary Parasitology* **2014**, *201*, doi:10.1016/j.vetpar.2014.01.008.
81. Kuri, S.; Billah, M.M.; Rana, S.M.M.; Naim, Z.; Islam, M.M.; Hasanuzzaman, M.; Ali, M.R.; Banik, R. Phytochemical and in vitro biological investigations of methanolic extracts of *Enhydra fluctuans* Lour. *Asian Pacific Journal of Tropical Biomedicine* **2014**, doi:10.12980/APJTB.4.2014C677.
82. Jayaraj, P.; Mathew, B.; Mani, C.; Govindarajan, R. Isolation of chemical constituents from *Spilanthes calva* DC: Toxicity, anthelmintic efficacy and in silico studies. *Biomedicine and Preventive Nutrition* **2014**, doi:10.1016/j.bionut.2014.04.002.
83. Mahato, K.; Kakoti, B.B.; Borah, S.; Kumar, M. Evaluation of in-vitro anthelmintic activity of *Heliotropium indicum* Linn. leaves in Indian adult earthworm. *Asian Pacific Journal of Tropical Disease* **2014**, doi:10.1016/S2222-1808(14)60451-5.
84. Vedomurthy, A.B.; Rampurawala, J.; Paarakh, P.M.; Jogaiah, S.; Joy Hoskeri, H. Evaluation of anthelmintic activity of *Momordica charantia* L. Seeds. *Indian Journal of Natural Products and Resources* **2015**, *6*, 153-155.
85. Kanojiya, D.; Shanker, D.; Sudan, V.; Jaiswal, A.K.; Parashar, R. Anthelmintic activity of *Ocimum sanctum* leaf extract against ovine gastrointestinal nematodes in India. *Research in Veterinary Science* **2015**, doi:10.1016/j.rvsc.2015.01.017.
86. Das, N.; Goshwami, D.; Hasan, M.S.; Raihan, S.Z.; Subedi, N.K. Phytochemical screening and in vitro anthelmintic activity of methanol extract of *Terminalia citrina* leaves. *Asian Pacific Journal of Tropical Disease* **2015**, doi:10.1016/S2222-1808(15)60881-7.
87. Raza, A.; Muhammad, F.; Bashir, S.; Aslam, B.; Anwar, M.; Naseer, M. In-vitro and in-vivo anthelmintic potential of different medicinal plants against *Ascaridia galli* infection in poultry birds. *World's Poultry Science Journal* **2016**, *72*, 115-124.
88. Cabardo, D.E.; Portugaliza, H.P. Anthelmintic activity of *Moringa oleifera* seed aqueous and ethanolic extracts against *Haemonchus contortus* eggs and third stage larvae. *International Journal of Veterinary Science and Medicine* **2017**, doi:10.1016/j.ijvsm.2017.02.001.
89. Nazneen, F.; Muddassir, M.; Meshram, K.; Umekar, M.; Lohiya, R. Phytochemical Screening and Comparative Anthelmintic Activity of Alcoholic Extracts of Some Herbal Plants. *Journal of Pharmaceutical Sciences and Research* **2017**, *9*, 1240.
90. Kaska, A.; Deniz, N.; Çiçek, M.; Mammadov, R. Evaluation of antioxidant properties, phenolic compounds, anthelmintic, and cytotoxic activities of various extracts isolated from *Nepeta cadmea*: an endemic plant for Turkey. *Journal of food science* **2018**, *83*, 1552-1559.

91. Váradyová, Z.; Pisarčíková, J.; Babják, M.; Hodges, A.; Mravčáková, D.; Kišidayová, S.; Königová, A.; Vadlejch, J.; Várady, M. Ovicidal and larvicidal activity of extracts from medicinal-plants against *Haemonchus contortus*. *Experimental parasitology* **2018**, *195*, 71-77.
92. Halder, S.; Saqueeb, N.; Qais, N. Antinociceptive and Anthelmintic Activities of Leaves of *Leea aequata*. *Dhaka University Journal of Pharmaceutical Sciences* **2018**, *17*, 251-255.
93. Gonzales, A.P.P.F.; Santos, G.G.; Tavares-Dias, M. Anthelmintic potential of the *Ficus insipida* latex on monogeneans of *Colossoma macropomum* (Serrasalmidae), a medicinal plant from the Amazon. *Acta parasitologica* **2019**, *64*, 927-931.
94. Herath, H.; Preston, S.; Jabbar, A.; Garcia-Bustos, J.; Addison, R.S.; Hayes, S.; Rali, T.; Wang, T.; Koehler, A.V.; Chang, B.C.H.; et al. Selected alpha-pyrones from the plants *Cryptocarya novoguineensis* (Lauraceae) and *Piper methysticum* (Piperaceae) with activity against *Haemonchus contortus* in vitro. *Int J Parasitol Drugs Drug Resist* **2019**, *9*, 72-79, doi:10.1016/j.ijpddr.2018.12.006.
95. Nsereko, G.; Emudong, P.; Omujal, J.; Acai, J.; Kungu, J.M.; Kabi, F.; Mugerwa, S.; Bugeza, J. Comparison of the efficacy of crude methanolic extracts of *Cassia occidentalis* and *Euphorbia hirta* with levamisole-HCL against gastrointestinal nematodes of economic importance to goat production in Uganda. *Tropical animal health and production* **2019**, *51*, 2269-2278.
